# Supplementary material
Source: ML conference proceedings conference paper supplement (https://openaccess.thecvf.com/content/CVPR2021/html/Tang_Mutual_CRF-GNN_for_CVPR_2021_paper.html)
Supplement: Supplementary file 1 [file Tang_Mutual_CRF-GNN_for_CVPR_2021_supplemental.pdf]

# Mutual CRF-GNN for Few-shot Learning

Shixiang Tang<sup>1†</sup> Dapeng Chen<sup>2</sup> Lei Bai<sup>1</sup> Kaijian Liu<sup>2</sup> Yixiao Ge<sup>3</sup> Wanli Ouyang<sup>1</sup>

<sup>1</sup>The University of Sydney, SenseTime Computer Vision Group, Australia

<sup>2</sup>Sensetime Group Limited, Hong Kong

<sup>3</sup>The Chinese University of Hong Kong, Hong Kong

{stan3903, lei.bai, wanli.ouyang}@sydney.edu.au

liukaijian@sensetime.com dapengchenxjtu@yahoo.com yxge@link.cuhk.edu.hk

## 1. Notation Clarification

To distinguish from the main text, we use S-Fig, S-Tab, and S-Eq to name figures, tables, and equations presented in the supplementary material, correspondingly.

## 2. Pseudocode of Mutual CRF-GNN

Algorithm 1 and Algorithm 2 summarize the training and evaluation protocol of Mutual CRF-GNN (MCGN), respectively.

---

**Algorithm 1** Training procedure of Mutual CRF-GNN in one episode

---

**Require:** a support set

$$\mathcal{S} = \{(\mathbf{x}_1, y_1), (\mathbf{x}_2, y_2), \dots, (\mathbf{x}_{N \times K}, y_{N \times K})\};$$

**Require:** a query set

$$\mathcal{Q} = \{(\mathbf{x}_{N \times K+1}, y_{N \times K+1}), \dots, (\mathbf{x}_{N \times K+T}, y_{N \times K+T})\};$$

**Require:** the backbone of feature extractor  $f_{emb}$ ;

**Require:** feature transformer  $\sigma$  in GNN;

Initialize features nodes  $\mathbf{F}^1$  and affinities  $\mathbf{A}^0$  by  $\mathbf{F}^1 = f_{emb}(\mathbf{x}_i)$  and Eq. (8);

**for**  $l$  in  $[1, L]$  **do**

    Compute unary compatibility  $\Psi_l$  and binary compatibility  $\Phi_l$  in  $\mathcal{G}_l^{crf}$  by Eq. (3) and Eq. (4), respectively;

    Compute marginal distribution  $\mathbf{P}(u_i^l)$  in  $\mathcal{G}^{crf}$  by Eq. (5);

    Compute  $\mathbf{A}_l$  by Eq. (6);

    Aggregate features  $\mathbf{F}^{l+1}$  by Eq. (1);

**end for**

Compute  $\mathcal{L}^{crf}$  by Eq. (9),  $\mathcal{L}^{gnn}$  Eq. (10) and  $\mathcal{L} = \lambda_{crf} \mathcal{L}^{crf} + \lambda_{gnn} \mathcal{L}^{gnn}$ ;

Update  $f_{emb}$  and  $\sigma$  by backward propagation;

---

## 3. Flowcharts of Baseline, GNN-only, CRF-only, CRF+GNN and MCGN

In the ablation study (Sec. 4.4), we introduce five variants of Mutual CRF-GNN Network, namely Baseline, GNN-only, CRF-only, CRF+GNN, and MCGN. The

<sup>†</sup>This work was done when Shixiang Tang was an intern at SenseTime.

---

**Algorithm 2** Evaluation procedure of Mutual CRF-GNN in one episode

---

**Require:** a support set

$$\mathcal{S} = \{(\mathbf{x}_1, y_1), (\mathbf{x}_2, y_2), \dots, (\mathbf{x}_{N \times K}, y_{N \times K})\};$$

**Require:** a query set

$$\mathcal{Q} = \{(\mathbf{x}_{N \times K+1}, y_{N \times K+1}), \dots, (\mathbf{x}_{N \times K+T}, y_{N \times K+T})\};$$

**Require:** the backbone of feature extractor  $f_{emb}$ ;

**Require:** feature transformer  $\sigma$  in GNN;

Initialize features nodes  $\mathbf{F}^1$  and affinities  $\mathbf{A}^0$  by  $\mathbf{F}^1 = f_{emb}(\mathbf{x}_i)$  and Eq. (8);

**for**  $l$  in  $[1, L]$  **do**

    Compute unary compatibility  $\Psi_l$  and binary compatibility  $\Phi_l$  in  $\mathcal{G}_l^{crf}$  by Eq. (3) and Eq. (4), respectively;

    Compute marginal distribution  $\mathbf{P}(u_i^l)$  in  $\mathcal{G}^{crf}$  by Eq. (5);

    Compute  $\mathbf{A}_l$  by Eq. (6);

    Aggregate features  $\mathbf{F}^{l+1}$  by Eq. (1);

**end for**

Compute prediction of samples in query set by Eq. (11);

---

flowcharts of these variants are presented in S-Fig. 1. Specifically, **Baseline** is the MatchingNet [6] where similarities between support samples and query samples are directly calculated from feature embeddings. **GNN-only** is the GNN embedding model which can aggregate features and affinities but the affinity for GNN is defined by the embeddings of two connected nodes. **CRF-only** is the model where a single CRF directly follows the backbone. **CRF+GNN** is the model with two branches. One is the GNN branch which is the same as GNN-only and the other is the CRF branch which is the same as CRF-only. In this setting, CRF and GNN can not mutually contribute to each other. **MCGN** is the proposed method where CRF inference is leveraged to infer the affinity in GNN.

## 4. Sensitivity of Hyper-parameters

In this paper, we introduce several hyper-parameters, including the tolerance  $\eta$  when constructing unary compatibility  $\psi$ , the weight  $\lambda^{gnn}$ ,  $\lambda^{crf}$  of loss  $\mathcal{L}^{gnn}$  and  $\mathcal{L}^{crf}$  in the final loss  $\mathcal{L}$ .

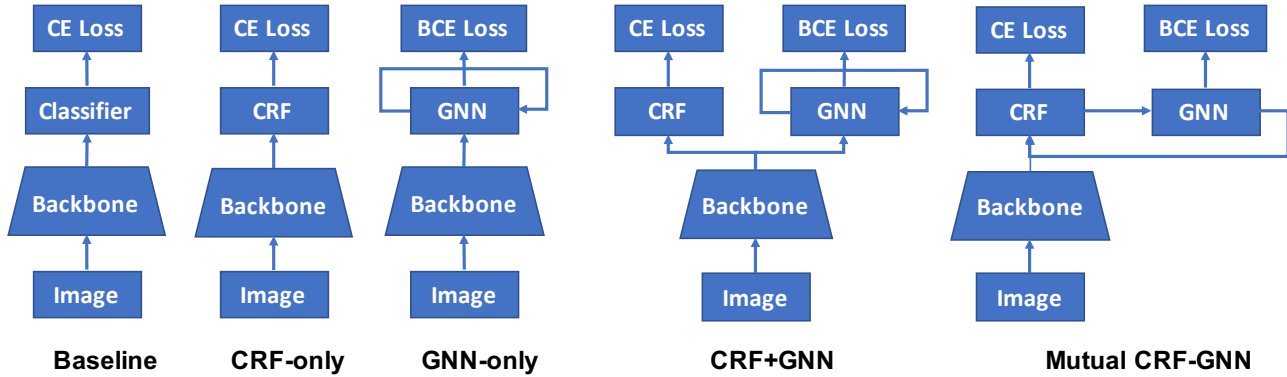

S-Figure 1: The flowchart of five variants, namely Baseline, CRF-only, GNN-only, CRF+GNN and MCGN in the ablation study.

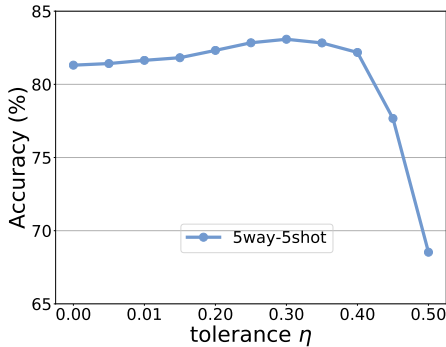

S-Figure 2: Sensitivity of tolerance  $\eta$ . All experiments are tested on *miniImageNet* in the 5-way 5-shot setting. The number of layers  $L$  is fixed to 5 and the maximum round number  $R = 7$ .

#### 4.1. Tolerance $\eta$

We tune the tolerance in *miniImageNet* in 5-way 5-shot setting. We set the number of layers  $L = 5$  and the maximum round number  $R = 7$ . The results are presented in S-Fig. 2. When tolerance  $\eta$  is near zero, the accuracy is relative low because it lacks flexibility that the variable has a tiny possibility of mislabelled even though they are observed. Specifically, if the tolerance  $\eta$  is set to 0, the marginal distribution of all random variables corresponding to support samples is deemed to be one-hot. In this scenario, the marginal distribution of random variables is dependent on affinities between query variables and support variables only. When the tolerance  $\eta$  is very high, the accuracy also decreases because there are too much noisy messages for the observations to be delivered to the random variable. We experimentally find that  $\eta = 0.3$  is the optimal choice.

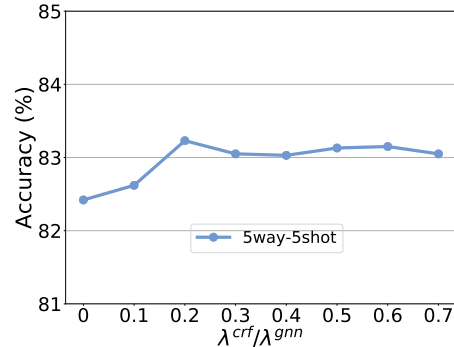

S-Figure 3: Sensitivity of loss weight ratio  $\lambda^{crf}/\lambda^{gnn}$  when fixing  $\lambda^{gnn} = 1$ . All experiments are tested on *miniImageNet* in the 5-way 5-shot setting. The number of layers  $L$  is fixed to 5 and the maximum round number  $R$  is fixed to 7.

#### 4.2. Loss weight ratio $\lambda^{crf}/\lambda^{gnn}$

The loss weight  $\lambda^{gnn}$  and  $\lambda^{crf}$  denotes the importance of  $\mathcal{L}^{gnn}$  and  $\mathcal{L}^{crf}$ , respectively. Following the typical implementations in EGNN [3] and DPGN [7], we set  $\mu_l^{crf}$  and  $\mu_l^{gnn}$  to be 0.2 when  $l < L + 1$  and 1 when  $l = L + 1$ . We fix  $\lambda^{gnn}$  to be 1 and then tuned  $\lambda^{crf}$  from 0 to 0.7. As shown in S-Fig. 3, the performance of MCGN is low when removing  $\mathcal{L}^{crf}$  from the loss function (i.e., set  $\lambda^{crf} = 0$ ), which shows the importance of jointly optimizing pairwise relations by  $\mathcal{L}^{gnn}$  and class-level relations by  $\mathcal{L}^{crf}$ . Besides, the accuracy is not sensitive to  $\lambda^{crf}/\lambda^{gnn}$  when  $\lambda^{crf}/\lambda^{gnn} > 0.1$ . Please note that  $\lambda^{crf} = 0$  is different from GNN-only in Tab. (3). In GNN-only, we only use GNN and no CRFs are involved. However, when  $\lambda^{crf} = 0$ , we still incorporate CRF in each GNN layer but do not supervise the marginal distribution of CRF. In this case, GNN can benefit from support labels by CRF although the

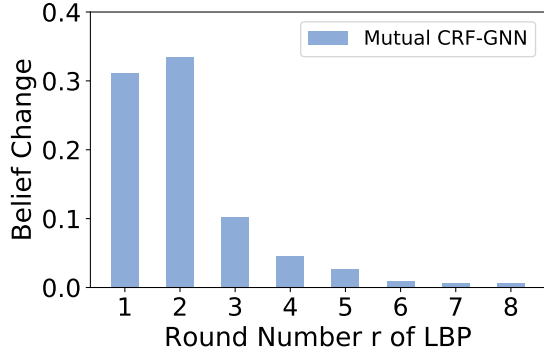

S-Figure 4: The impact of the different round number of LBP with the belief change. When the round number  $r \geq 6$ , the belief change approaches 0, which indicates the convergence of LBP. Please note the number of layer in Mutual CRF-GNN is 5.

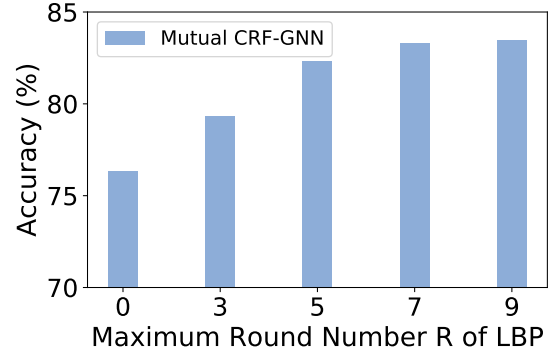

S-Figure 5: The impact of maximum round number of belief propagation. We perform the experiments on *miniImageNet* in 5-way 5-shot setting. When the maximum round number  $R < 7$ , the accuracy increases with larger maximum round number. Please note the number of layer in Mutual CRF-GNN is 5.

marginal distribution can not be directly supervised.

## 5. Marginal Distribution Inference by Loopy Belief Propagation

The marginal distribution  $\mathbf{P}(u_i^l | \mathbf{F}^l, \mathcal{Y}_s)$  of variable  $u_i^l$  is obtained by marginalizing out all random variables other than  $u_i^l$  in CRF. Mathematically, i.e.,

$$\mathbf{P}(u_i^l | \mathbf{F}^l, \mathcal{Y}_s) \propto \sum_{\mathcal{V}_i^{crf} \setminus \{u_i^l\}} \mathbf{P}(u_1^l, u_2^l, \dots, u_{N \times K + T}^l | \mathbf{F}^l, \mathcal{Y}_s), \quad (1)$$

where  $\mathbf{P}(u_i^l = m | \mathbf{F}^l, \mathcal{Y}_s) = p_{i,m}^l$ , in which  $p_{i,m}^l$  represents the possibility of  $u_i^l$  assigned label  $m$ . Marginal distribution requires the summation of all possible figures and can give a better prediction for each variable. In this paper, we adopt the loopy belief propagation [8, 4] to calculate marginal distribution.

### 5.1. Loopy Belief Propagation

In the following, we briefly introduce Loopy Belief Propagation (LBP) for inferring the marginal distributions of random variables  $\mathbf{P}(u_i^l | \mathbf{F}^l, \mathcal{Y}_s)$ . LBP maintains a belief  $\mathbf{b}'_{l,i}$  of random variable  $u_i$  to represent the marginal distribution  $\mathbf{P}(u_i^l | \mathbf{F}^l, \mathcal{Y}_s)$ .  $\mathbf{b}'_{l,i} \in \mathbb{R}^{1 \times N}$  is a column vector and its  $j$ -th element is the marginal probability of  $u_i^l$  taking value  $j$ . According to LBP [8], given a initial  $(\mathbf{b}_{l,i})^0$ , the belief  $\mathbf{b}'_{l,i}$  is obtained by running the following update rules until convergence,

$$\mathbf{m}_{l,i \rightarrow j}^r = [\phi(u_i^l, u_j^l) ((\mathbf{b}_{l,i})^{r-1} \oslash \mathbf{m}_{l,j \rightarrow i}^{r-1})], \quad (2)$$

$$(\mathbf{b}_{l,j})^r \propto \begin{cases} \psi(u_j^l) \prod_{i \in \mathcal{N}_j} \mathbf{m}_{l,i \rightarrow j}^r & \text{if } j \leq N \times K, \\ \prod_{i \in \mathcal{N}_j} \mathbf{m}_{l,i \rightarrow j}^r & \text{if } j > N \times K. \end{cases} \quad (3)$$

where  $r$  denotes the round index of belief propagation and  $r \in [0, R]$  with  $R$  as the maximum round number,  $\mathbf{m}_{l,i \rightarrow j}^r$

is the message from  $u_i^l$  to  $u_j^l$ ,  $\phi_{ij}^l$  is the compatibility between variables for the  $l$ -th layer obtained using Eq. (4),  $[\cdot]$  represents a normalization function that divides a vector by the sum of its elements,  $\oslash$  represents the element-wise division between two vectors,  $\mathcal{N}_j$  represents the neighbors of node  $j$  and the product of messages  $\prod_{i \in \mathcal{N}_j} \mathbf{m}_{l,i \rightarrow j}^r$  means element-wise multiplication. We do not have unary compatibility  $\psi_j^l$  when  $j > N \times K$  because query samples have no observations (labels). We get  $\mathbf{b}'_{l,i} = (\mathbf{b}_{l,i})^R$ , where  $R$  is the index of last iteration before LBP stops.

### 5.2. Convergence of LBP for Inference

Loopy belief propagation is a standard method of marginal distribution inference. It converges in most cases but cannot be theoretically confirmed, which leads to divergence in some cases [2, 1]. To explore the convergence empirically, we define belief change in MCGN as

$$\Delta_r = \frac{1}{L} \sum_{l=1}^L \sum_{i=1}^{N \times K + T} \|(\mathbf{b}_{l,i})^{r+1} - (\mathbf{b}_{l,i})^r\|, \quad (4)$$

where  $L$  is number of layers in Mutual CRF-GNN. We report  $\Delta_r$  with the  $r$ -th round of belief propagation in S-Fig. 4.  $\Delta_r$  is large when the round index  $r$  is less than 3 and will decay from  $r = 3$  to  $r = 5$ . Finally, it will converge to 0 when the round index is larger than 5. The diminish of  $\Delta_r$  illustrates the convergence of belief  $\{(\mathbf{b}_{l,i})^r\}_{i=1}^{N \times K + T}$  when  $r \geq 6$ .

### 5.3. Maximum Round Number $R$ in LBP

To illustrate the improvement by the maximum round number  $R$  of belief propagation, we initialize the belief  $(\mathbf{b}_{l,i})^0$  in S-Eq. 3 by the cosine similarity of the features  $\mathbf{F}^l = \{\mathbf{f}_i^l\}_{i=1}^{N \times K + T}$  and the prototypes  $\{\mathbf{c}_i^l\}_{i=1}^N$ , i.e.,  $(\mathbf{b}_{l,j})^0 =$

$(\mathbf{c}_1^l \top \mathbf{f}_j^l, \dots, \mathbf{c}_N^l \top \mathbf{f}_j^l)$ , where  $\mathbf{c}_i^l = \frac{1}{K} \sum_{y_m=i} \mathbf{f}_m^l$  and  $K$  is the number of shots. In this paper, we treat the maximum round number as a hyperparameter and perform experiments on it. The results are reported in S-Fig. 5. The testing accuracy raises from 76.34% to 83.03% when  $R$  increases and it comes to converge if  $R \geq 7$ . The convergence can be explained by the convergence of LBP. As illustrated in S-Fig. 4, when  $r \geq 6$ , the belief change approaches 0, which means LBP converges when we set the maximum round index  $R \geq 7$ .

#### 5.4. Time Complexity of LBP

The computational cost of LBP is  $|E|S^2r$  [5], where  $|E|$  is the number of edges in CRF,  $S$  is number of possible variable states,  $R$  is the maximum round number of LBP. Here,  $|E| \approx (N \times K + T)^2$ ,  $S = N$ , where  $N$  is the number of classes and  $K$  is the number of shots. So the time complexity is  $O((N \times K + T)^2 N^2 R)$ .

#### References

- [1] Alexander T Ihler, John W Fisher, and Alan S Willsky. Message errors in belief propagation. In *Advances in Neural Information Processing Systems*, pages 609–616, 2005. 3
- [2] Alexander T Ihler, Alan S Willsky, et al. Loopy belief propagation: Convergence and effects of message errors. *Journal of Machine Learning Research*, 6(May):905–936, 2005. 3
- [3] Jongmin Kim, Taesup Kim, Sungwoong Kim, and Chang D Yoo. Edge-labeling graph neural network for few-shot learning. In *Proceedings of the IEEE Conference on Computer Vision and Pattern Recognition*, pages 11–20, 2019. 2
- [4] Daphne Koller and Nir Friedman. *Probabilistic graphical models: principles and techniques*. MIT press, 2009. 3
- [5] Koichi Ogawara. Approximate belief propagation by hierarchical averaging of outgoing messages. In *2010 20th International Conference on Pattern Recognition*, pages 1368–1372. IEEE, 2010. 4
- [6] Oriol Vinyals, Charles Blundell, Timothy Lillicrap, Daan Wierstra, et al. Matching networks for one shot learning. In *Advances in neural information processing systems*, pages 3630–3638, 2016. 1
- [7] Ling Yang, Liangliang Li, Zilun Zhang, Xinyu Zhou, Erjin Zhou, and Yu Liu. Dpgn: Distribution propagation graph network for few-shot learning. In *Proceedings of the IEEE/CVF Conference on Computer Vision and Pattern Recognition (CVPR)*, June 2020. 2
- [8] Jaemin Yoo, Hyunsik Jeon, and U Kang. Belief propagation network for hard inductive semi-supervised learning. In *International Joint Conference on Artificial Intelligence*, pages 4178–4184, 2019. 3
